# Supplementary material for: In situ virtual restoration of artifacts by imaging technology
Source: Research Square preprint supplement (doi:10.21203/rs.3.rs-36072/v3), 2020-10-30
Supplement: Supplementary file 1 [file be631a432a108ffa0dff39cc.docx]

Table 1. Questionnaire on the evaluation of virtual imaging restoration.

|  | **Questionnaire** | | | | | | |
| --- | --- | --- | --- | --- | --- | --- | --- |
|  |
| **1** | Is this the first time you have seen the application of this technology in the restoration of artifacts? | | | | | | |
|  | A.Yes B.No C.Not sure | | | | | | |
| **2** | Can this restoration method improve your understanding or visiting experience of artifacts? | | | | | | |
|  | A.Yes B.No C.Not sure | | | | | | |
| **3** | Give a score to your visiting experience with virtual imaging restoration, from 1 (very insufficient) to 5 (very good). | | | | | | |
|  | _______________________ | | | | | | |
| **4** | Is this restoration method recommended? | | | | | | |
|  | A.Yes B.No C.Not sure | | | | | | |
| **5** | Give a score to how much you recommend it, from 1 (very unrecommended) to 5 (very recommended). | | | | | | |
|  | _______________________ | | | | | | |
| **6** | Give an overall score to the effect of virtual imaging restoration, from 1 (very insufficient) to 5 (very good). | | | | | | |
|  | _______________________ | | | | | | |
| **7** | **※**Do you think this restoration method does well in preserving the authenticity of artifacts? | | | | | | |
|  | A.Yes B.No C.Not sure | | | | | | |
| **8** | **※**Do you think this restoration method does well in reversibility? | | | | | | |
|  | A.Yes B.No C.Not sure | | | | | | |
| **9** | **※**Do you think this restoration method does well in discernibility? | | | | | | |
|  | A.Yes B.No C.Not sure | | | | | | |
| **10** | **※**Please compare the virtual imaging restoration with other restoration methods from the following aspects. If you think that the virtual imaging restoration is better than the compared method in a certain aspect, please fill in "+" in the corresponding position of the form, if It is worse than the compared method, please fill in "-", if the two methods are equal or incomparable, please fill in "○". | | | | | | |
|  |  | | | | | | |
| Restoration Methods | | Visiting Experience | Authenticity | Reversibility | Discernibility | Economy | Scope of Application |
| Physical Restoration | |  |  |  |  |  |  |
| Digital Restoration | |  |  |  |  |  |  |
| Digital Projection Restoration | |  |  |  |  |  |  |
| Patterns Restoration | |  |  |  |  |  |  |
| AR Restoration | |  |  |  |  |  |  |
|  | |  |  |  |  |  |  |
| **11** | Give your comments about the advantages and disadvantages of this restoration method. | | | | | | |
|  | _______________________ | | | | | | |
| **12** | What do you think needs to be improved for virtual imaging restoration? | | | | | | |
|  | _______________________ | | | | | | |
|  |  | | | | | | |

※question only for scholars
